# Supplementary material
Source: publisher figshare collection journal article supplement (https://sage.figshare.com/ndownloader/files/17890142)
Supplement: Supplementary file 1 [file 17890142]

## Online Appendix

### The Impact of Partisanship in the Era of Retrenchment: Insights from Quantitative Welfare State Research

Frank Bandau and Leo Ahrens

Published in *Journal of European Social Policy*

Table A1: Studies on Partisan Effects after the Golden Age

| Study                                   | Dependent Variable                                      | Countries | Period                 | Partisan Effect        |
|-----------------------------------------|---------------------------------------------------------|-----------|------------------------|------------------------|
| Burgoon 2001                            | Social Spending (A/H/P)                                 | 18        | 1980-1994              | (~)(~)(~)              |
| Castles, 2001                           | Social Spending (A)                                     | 19        | 1984-1997              | (~)                    |
| Swank and Martin 2001                   | Social Spending (A)                                     | 15        | 1979-1995              | (~)                    |
| <b>Kittel and Obinger 2003</b>          | Social Spending (A)                                     | 21        | 1982-1997              | (~)(~) <sup>f</sup>    |
| <b>Korpi and Palme 2003</b>             | Replacement Rates (A)                                   | 18        | 1975-1995              | (+)                    |
| Moene and Wallerstein 2003              | Social Spending (A/H/P/U)                               | 18        | 1980-1995              | (+)(+)(+)(~)           |
| <b>Allan and Scruggs, 2004</b>          | Replacement Rates (H/U)                                 | 18        | 1975-1999              | (+)(+)                 |
| Brandl and Traxler 2005                 | Social Spending (A)                                     | 20        | 1980-1996              | (~)                    |
| Castles, 2005                           | Social Spending (A)                                     | 21        | 1990-2001              | (~)                    |
| Hicks and Zorn 2005 (2007) <sup>a</sup> | Social Spending (A)                                     | 18        | 1978-1994              | (~)                    |
| <b>Swank 2005</b>                       | 1) Replacement Rates (H/P/U)<br>2) Generosity Index (A) | 18        | 1981-2000              | 1) (+)(+)(+)<br>2) (+) |
| <b>Amable et al. 2006</b>               | 1) Social Spending (A)<br>2) Replacement Rates (H)      | 18        | 1981-1999              | 1) (~)<br>2) (+)       |
| Brooks and Manza 2006a                  | Social Spending (A)                                     | 15        | 1986-2000              | (~)                    |
| Brooks and Manza 2006b                  | Social Spending (A)                                     | 14        | 1980-2000              | (~)                    |
| Jahn, 2006                              | Social Spending (A)                                     | 16        | 1980-2001              | (-)                    |
| Bolzendahl and Brooks 2007              | Social Spending (A)                                     | 12        | 1980-1999              | (~)                    |
| Bolzendahl 2009                         | Social Spending (A)                                     | 12        | 1980-1999              | (~)                    |
| Busemeyer 2009                          | Social Spending (A)                                     | 21        | 1980-2004              | (~)                    |
| <b>Hicks and Freeman 2009</b>           | Replacement Rates (P)                                   | 18        | 1975-2000              | (-)                    |
| <b>Potrafke 2009</b>                    | Social Spending (A)                                     | 20        | 1980-2003              | (~)                    |
| Tepe and Vanhuyse 2009                  | 1) Social Spending (P)<br>2) Generosity Index (P)       | 18        | 1980-2002              | 1) (~)<br>2) (~)       |
| Bolzendahl 2010                         | Generosity Index (A)                                    | 12        | 1980-2000              | (~)                    |
| <b>Jensen 2010</b>                      | Social Spending (A)                                     | 18        | 1980-2000              | (+)                    |
| <b>Kwon and Pontusson 2010</b>          | Social Spending (A)                                     | 16        | 1971-2002 <sup>c</sup> | (~)                    |
| <b>Potrafke 2010</b>                    | Social Spending (H)                                     | 18        | 1971-2004 <sup>c</sup> | (~)                    |
| Tepe and Vanhuyse 2010a                 | Social Spending (H/P/U)                                 | 21        | 1980-2003              | (~)(~)(~)              |
| <b>Tepe and Vanhuyse 2010b</b>          | Social Spending (A)                                     | 21        | 1980-2005              | (~) <sup>d</sup>       |
| Bolzendahl 2011                         | Social Spending (A/H/P)                                 | 12        | 1980-1999              | (~)(~)(~)              |
| <b>Finseraas and Vernby 2011</b>        | Generosity Index (A)                                    | 18        | 1972-2002 <sup>c</sup> | (+)                    |
| <b>Jensen 2011a</b>                     | 1) Replacement Rates (U)<br>2) Social Spending (H)      | 18        | 1980-2000              | 1) (+)<br>2) (~)       |

|                                              |                                                          |    |                        |                           |
|----------------------------------------------|----------------------------------------------------------|----|------------------------|---------------------------|
| <b>Jensen 2011b</b>                          | Social Spending (A)                                      | 18 | 1980-2001              | (~)                       |
| <b>Jensen 2011c</b>                          | Social Spending (H)                                      | 18 | 1980-2001              | (~)                       |
| Jensen 2011d                                 | Social Spending (A/H)                                    | 18 | 1985-2002              | (~)(~)                    |
| Jensen 2011e                                 | Social Spending (A)                                      | 18 | 1980-2002              | (~)                       |
| <b>Jordan 2011</b>                           | Social Spending (H)                                      | 18 | 1960-2000 <sup>c</sup> | (~)                       |
| <b>Lipsmeyer 2011</b>                        | Social Spending (A)                                      | 17 | 1981-1998              | (~)                       |
| Schmitt and Starke 2011                      | Social Spending (A/H/P/U)                                | 21 | 1980-2005              | (~)(~)(~)(~)              |
| Fernandez 2012                               | Generosity Index (P)                                     | 19 | 1981-2004              | (~)                       |
| <b>Jensen 2012a</b>                          | 1) Replacement Rates (U)<br>2) Social Spending (H)       | 18 | 1980-2002              | 1) (+)<br>2) (~)          |
| <b>Jensen 2012b</b>                          | Social Spending (H/P/U)                                  | 18 | 1980-2002              | (~)(~)(~)                 |
| Arnold 2013                                  | Replacement Rates (H)                                    | 31 | 1981-2010              | (~)                       |
| Danforth and Stephens 2013a <sup>b</sup>     | Replacement Rates (H/P/U)                                | 18 | 1975-2000              | (+)(~)(+)                 |
| Danforth and Stephens 2013b <sup>b</sup>     | Replacement Rates (H/P/U)                                | 18 | 1975-2000              | (+)(+)(~)                 |
| Schmitt 2013                                 | Spending (Aggregate)                                     | 21 | 1980-2007              | (~)                       |
| Wenzelburger et al. 2013a <sup>b</sup>       | Replacement Rates (H/P/U)                                | 18 | 1990-2000              | (+)(~)(~)                 |
| Wenzelburger et al. 2013b <sup>b</sup>       | Replacement Rates (H/P/U)                                | 18 | 1990-2000              | (~)(~)(~)                 |
| <b>Galasso 2014</b>                          | Replacement Rates (U)                                    | 25 | 1975-2007              | (+)                       |
| <b>Herwartz and Theilen, 2014</b>            | Social Spending (A)                                      | 21 | 1980-2008              | (~)                       |
| <b>Hwang and Lee 2014</b>                    | Social Spending (A)                                      | 31 | 1980-2001              | (~)                       |
| Immergut and Abou-Chadi 2014                 | Generosity Index (P)                                     | 16 | 1980-2003              | (+)                       |
| Jensen and Mortensen 2014                    | Replacement Rates (U)                                    | 17 | 1980-2007              | (+)                       |
| Jensen et al. 2014                           | Replacement Rates (U)                                    | 18 | 1976-2000              | (+)                       |
| Jurado 2014                                  | Social Spending (A)                                      | 22 | 1980-2006              | (-)                       |
| <b>Montanari and Nelson 2014</b>             | Generosity Index (H)                                     | 18 | 1980-2005              | (+)                       |
| Reeves et al. 2014                           | Social Spending (H)                                      | 27 | 1995-2011              | (~)                       |
| Tromborg 2014                                | Social Spending (P/U)                                    | 18 | 1980-2007              | (~)(~)                    |
| <b>Wolf et al. 2014</b>                      | Replacement Rates (H/P/U)                                | 18 | 1980-1999              | (+)(~)(+)                 |
| <b>Döring and Schwander 2015<sup>e</sup></b> | Replacement Rates (U)                                    | 18 | 1975-1999              | (+)(+)(~)                 |
| <b>Jensen and Seeberg 2015</b>               | Social Spending (A)                                      | 23 | 1980-2007              | (+)                       |
| Knotz and Lindvall 2015                      | Replacement Rates (U)                                    | 25 | 1985-2008              | (+)                       |
| <b>Stephens 2015</b>                         | 1) Social Spending (A/H)<br>2) Replacement Rates (H/P/U) | 18 | 1986-2010              | 1) (+)(~)<br>2) (~)(~)(~) |
| <b>Armingeon et al. 2016</b>                 | Social Spending (A)                                      | 17 | 1982-2009              | (~)                       |
| Fervers et al. 2016                          | Social Spending (H)                                      | 22 | 1980-2009              | (+)                       |
| Hooghe and Oser 2016                         | Social Spending (A)                                      | 30 | 1980-2010              | (~)                       |
| <b>Schmitt 2016</b>                          | Social Spending (A)                                      | 21 | 1980-2009              | (+)                       |

Notes: Welfare Programs: A = Aggregate, H = Health/Sick Pay, P = Pensions, U = Unemployment; Partisan Effects: (+) = Partisan Effects, (~) = No Partisan Effects, (-) = Reversed Partisan Effects.

The studies are presented in temporal order. Studies in bold are focusing on partisanship or treat it at least as one of the major independent variables and not as a mere control variable.

<sup>a</sup> The revision published in 2007 confirms the original results.

<sup>b</sup> Both studies have been split due to conducting similar tests with two different datasets.

<sup>c</sup> Studies contain separate analyses for the post-1973 period.

<sup>d</sup> Significant partisan effects regarding smaller cutbacks.

<sup>e</sup> The study contains three tests which differ regarding the operationalisation of the independent variable (partisanship).

<sup>f</sup> The study contains two tests which differ regarding the data structure.

Table A2: Studies Controlling for Time Effects

| Study                     | Total Period | Dependent Variable | Decline over Time |
|---------------------------|--------------|--------------------|-------------------|
| Kittel and Obinger 2003   | 1982-1997    | Spending           | Yes               |
| Potrafke 2009             | 1980-2003    | Spending           | Yes               |
| Kwon and Pontusson 2010   | 1971-2002    | Spending           | Yes               |
| Potrafke 2010             | 1971-2004    | Spending           | Yes               |
| Finseraas and Vernby 2011 | 1972-2002    | Entitlements       | No                |
| Jensen 2011b              | 1980-2001    | Spending           | Yes               |
| Jensen 2011c              | 1980-2001    | Spending           | Yes               |
| Jordan 2011               | 1960-2000    | Spending           | Yes               |
| Herwartz and Theilen 2014 | 1980-2008    | Spending           | Yes               |
| Wolf et al. 2014          | 1980-1999    | Entitlements       | Yes*              |
| Fervers et al. 2016       | 1980-2009    | Spending           | Yes               |
| Schmitt 2016              | 1980-2009    | Spending           | No                |

\* Declining partisan effects regarding unemployment and health care but not pensions.

### List of Included Studies

- Allan, J.P. and Scruggs, L.A. (2004) 'Political Partisanship and Welfare State Reform in Advanced Industrial Societies', *American Journal of Political Science* 48(3): 496–512.
- Amable, B., Gatti, D. and Schumacher, J. (2006) 'Welfare-State Retrenchment. The Partisan Effect Revisited', *Oxford Review of Economic Policy* 22(3): 426–44.
- Armingeon, K., Guthmann, K. and Weisstanner, D. (2016) 'Choosing the Path of Austerity. How Parties and Policy Coalitions Influence Welfare State Retrenchment in Periods of Fiscal Consolidation', *West European Politics* 39(4): 628–47.
- Arnold, D. (2013) 'Benefit Morale and Cross-Country Diversity in Sick Pay Entitlements', *Kyklos* 66(1): 27–45.
- Bolzendahl, C. (2009) 'Making the Implicit Explicit. Gender Influences on Social Spending in Twelve Industrialized Democracies, 1980-99', *Social Politics* 16(1): 40–81.
- Bolzendahl, C. (2010) 'Directions of Decommodification. Gender and Generosity in 12 OECD Nations, 1980-2000', *European Sociological Review* 26(2): 125–41.
- Bolzendahl, C. (2011) 'Beyond the Big Picture. Gender Influences on Disaggregated and Domain-Specific Measures of Social Spending, 1980-1999', *Politics & Gender* 7(1): 35–70.
- Bolzendahl, C. and Brooks, C. (2007) 'Women's Political Representation and Welfare Spending in 12 Capitalist Democracies', *Social Forces* 85(4): 1509–34.
- Brandl, B. and Traxler, F. (2005) 'Industrial Relations, Social Pacts and Welfare Expenditures. A Cross-National Comparison', *British Journal of Industrial Relations* 43(4): 635–58.
- Brooks, C. and Manza, J. (2006a) 'Social Policy Responsiveness in Developed Democracies', *American Sociological Review* 71(3): 474–94.
- Brooks, C. and Manza, J. (2006b) 'Why Do Welfare States Persist?', *The Journal of Politics* 68(4): 816–27.
- Burgoon, B. (2001) 'Globalization and Welfare Compensation. Disentangling the Ties that Bind', *International Organization* 55(3): 509–51.
- Busemeyer, M.R. (2009) 'From Myth to Reality. Globalisation and Public Spending in OECD Countries Revisited', *European Journal of Political Research* 48(4): 455–82.
- Castles, F.G. (2001) 'On the Political Economy of Recent Public Sector Development', *Journal of European Social Policy* 11(3): 195–211.
- Castles, F.G. (2005) 'Social Expenditure in the 1990s. Data and Determinants', *Policy & Politics* 33(3): 411–30.

- Danforth, B. and Stephens, J.D. (2013) 'Measuring Social Citizenship. Achievements and Future Challenges', *Journal of European Public Policy* 20(9): 1285–98.
- Döring, H. and Schwander, H. (2015) 'Revisiting the Left Cabinet Share. How to Measure the Partisan Profile of Governments in Welfare State Research', *Journal of European Social Policy* 25(2): 175–93.
- Fernandez, J.J. (2012) 'Economic Crisis, Population Aging and the Electoral Cycle. Explaining Pension Policy Retrenchments in 19 OECD Countries, 1981-2004', *International Journal of Comparative Sociology* 53(2): 77–96.
- Fervers, L., Oser, P. and Picot, G. (2016) 'Globalization and Healthcare Policy. A Constraint on Growing Expenditures', *Journal of European Public Policy* 23(2): 197–216.
- Finseraas, H. and Vernby, K. (2011) 'What Parties Are and What Parties Do. Partisanship and Welfare State Reform in an Era of Austerity', *Socio-Economic Review* 9(4): 613–38.
- Galasso, V. (2014) 'The Role of Political Partisanship during Economic Crises', *Public Choice* 158(1): 143–65.
- Herwartz, H. and Theilen, B. (2014) 'Partisan Influence on Social Spending under Market Integration, Fiscal Pressure and Institutional Change', *European Journal of Political Economy* 34: 409–24.
- Hicks, A.M. and Freeman, K. (2009) 'Pension Income Replacement. Permanent and Transitory Determinants', *Journal of European Public Policy* 16(1): 127–43.
- Hicks, A.M. and Zorn, C. (2005) 'Economic Globalization, the Macro Economy, and Reversals of Welfare. Expansion in Affluent Democracies, 1978-94', *International Organization* 59(3): 631–62.
- Hooghe, M. and Oser, J. (2016) 'Trade Union Density and Social Expenditure. A Longitudinal Analysis of Policy Feedback Effects in OECD Countries, 1980-2010', *Journal of European Public Policy* 23(10): 1520–42.
- Hwang, W. and Lee, H. (2014) 'Globalization, Factor Mobility, Partisanship, and Compensation Policies', *International Studies Quarterly* 58(1): 92–105.
- Immergut, E.M. and Abou-Chadi, T. (2014) 'How Electoral Vulnerability Affects Pension Politics. Introducing a Concept, Measure and Empirical Application', *European Journal of Political Research* 53(2): 269–87.
- Jahn, D. (2006) 'Globalization as "Galton's Problem". The Missing Link in the Analysis of Diffusion Patterns in Welfare State Development', *International Organization* 60(2): 401–31.
- Jensen, C. (2010) 'Issue Compensation and Right-Wing Government Social Spending', *European Journal of Political Research* 49(2): 282–99.
- Jensen, C. (2011a) 'Marketization via Compensation. Health Care and the Politics of the Right in Advanced Industrialized Nations', *British Journal of Political Science* 41(4): 907–26.
- Jensen, C. (2011b) 'Negotiated Expansion. Left-Wing Governments, Corporatism and Social Expenditure in Mature Welfare States', *Comparative European Politics* 9(2): 168–90.
- Jensen, C. (2011c) 'Determinants of Welfare Service Provision after the Golden Age', *International Journal of Social Welfare* 20(2): 125–34.
- Jensen, C. (2011d) 'Conditional Contraction. Globalisation and Capitalist Systems', *European Journal of Political Research* 50(2): 168–89.
- Jensen, C. (2011e) 'Catching Up by Transition. Globalization as a Generator of Convergence in Social Spending', *Journal of European Public Policy* 18(1): 106–21.
- Jensen, C. (2012a) 'Labour Market- versus Life Course-Related Social Policies. Understanding Cross-Programme Differences', *Journal of European Social Policy* 19(2): 275–91.
- Jensen, C. (2012b) 'Two Sides of the Same Coin? Left-Wing Governments and Labour Unions as Determinants of Public Spending', *Socio-Economic Review* 10(2): 217–40.
- Jensen, C., Knill, C., Schulze, K. and Tosun, J. (2014) 'Giving Less by Doing More? Dynamics of Social Policy Expansion and Dismantling in 18 OECD Countries', *Journal of European Public Policy* 21(4): 528–48.
- Jensen, C. and Mortensen, P.B. (2014) 'Government Responses to Fiscal Austerity. The Effect of Institutional Fragmentation and Partisanship', *Comparative Political Studies* 47(2): 143–70.
- Jensen, C. and Seeberg, H.B. (2015) 'The Power of Talk and the Welfare State. Evidence from 23 Countries on an Asymmetric Opposition-Government Response Mechanism', *Socio-Economic Review* 13(2): 215–33.
- Jordan, J. (2011) 'Health Care Politics in the Age of Retrenchment', *Journal of Social Policy* 40(1): 113–34.
- Jurado, I. (2014) 'Party System Nationalisation and Social Spending', *European Journal of Political Research* 53(2): 288–307.

- Kittel, B. and Obinger, H. (2003) 'Political Parties, Institutions, and the Dynamics of Social Expenditure in Times of Austerity', *Journal of European Public Policy* 10(1): 20–45.
- Knotz, C. and Lindvall, J. (2015) 'Coalitions and Compensation. The Case of Unemployment Benefit Duration', *Comparative Political Studies* 48(5): 586–615.
- Korpi, W. and Palme, J. (2003) 'New Politics and Class Politics in the Context of Austerity and Globalization. Welfare State Regress in 18 Countries, 1975-95', *American Political Science Review* 97(3): 425–46.
- Kwon, H.Y. and Pontusson, J. (2010) 'Globalization, Labour Power and Partisan Politics Revisited', *Socio-Economic Review* 8(2): 251–81.
- Lipsmeyer, C.S. (2011) 'Boom and Busts. How Parliamentary Governments and Economic Context Influence Welfare Policy', *International Studies Quarterly* 55(4): 959–80.
- Moene, K.O. and Wallerstein, M. (2003) 'Earnings Inequality and Welfare Spending. A Disaggregated Analysis', *World Politics* 55(4): 485–516.
- Montanari, I. and Nelson, K. (2014) 'Health Care Determinants in Comparative Perspective. The Role of Partisan Politics for Health Care Provision', *International Journal of Comparative Sociology* 54(5-6): 445–66.
- Potrafke, N. (2009) 'Did Globalization Restrict Partisan Politics? An Empirical Evaluation of Social Expenditures in a Panel of OECD Countries', *Public Choice* 140(1-2): 105–24.
- Potrafke, N. (2010) 'The Growth of Public Health Expenditures in OECD Countries. Do Government Ideology and Electoral Motives Matter?', *Journal of Health Economics* 29(6): 797–810.
- Reeves, A., McKee, M., Basu, S. and Stuckler, D. (2014) 'The Political Economy of Austerity and Health Care. Cross-National Analysis of Expenditure Changes in 27 European Nations 1995-2011', *Health Policy* 115(1): 1–8.
- Schmitt, C. (2013) 'Culture, Closeness, or Commerce? Policy Diffusion and Social Spending Dynamics', *Swiss Political Science Review* 19(2): 123–38.
- Schmitt, C. (2016) 'Panel Data Analysis and Partisan Variables. How Periodization Does Influence Partisan Effects', *Journal of European Public Policy* 23(10): 1442–59.
- Schmitt, C. and Starke, P. (2011) 'Explaining Convergence of OECD Welfare States. A Conditional Approach', *Journal of European Social Policy* 21(2): 120–35.
- Stephens, J.D. (2015) 'Revisiting Pierson's Work on the Politics of Welfare State Reform in the Era of Retrenchment Twenty Years Later', *Political Science & Politics* 48(2): 274–78.
- Swank, D. (2005) 'Globalisation, Domestic Politics, and Welfare State Retrenchment in Capitalist Democracies', *Social Policy and Society* 4(2): 183–95.
- Swank, D. and Martin, C.J. (2001) 'Employers and the Welfare State. The Political Economic Organization of Firms and Social Policy in Contemporary Capitalist Democracies', *Comparative Political Studies* 34(8): 889–923.
- Tepe, M. and Vanhuyse, P. (2009) 'Are Aging OECD Welfare States on the Path to Gerontocracy?', *Journal of Public Policy* 29(1): 1–28.
- Tepe, M. and Vanhuyse, P. (2010a) 'Elderly Bias, New Social Risks and Social Spending. Change and Timing in Eight Programmes across Four Worlds of Welfare, 1980-2003', *Journal of European Social Policy* 20(3): 217–34.
- Tepe, M. and Vanhuyse, P. (2010b) 'Who Cuts Back and When? The Politics of Delays in Social Expenditure Cutbacks, 1980-2005', *West European Politics* 33(6): 1214–40.
- Tromborg, M.W. (2014) 'Bringing the Median Voter Back In. The Relationship between Government Debt, Median Voter Preferences, and Welfare State Spending', *Journal of European Social Policy* 24(2): 107–21.
- Wenzelburger, G., Zohlnhöfer, R. and Wolf, F. (2013) 'Implications of Dataset Choice in Comparative Welfare Research', *Journal of European Public Policy* 20(9): 1229–50.
- Wolf, F., Zohlnhöfer, R. and Wenzelburger, G. (2014) 'The Politics of Public and Private Pension Generosity in Advanced Democracies', *Social Policy & Administration* 48(1): 86–106.

Table A3: Probit Regression Results

|                                      | Coefficient | Standard error | <i>p</i> -value |
|--------------------------------------|-------------|----------------|-----------------|
| Policy field                         |             |                |                 |
| Aggregate                            | 0.81        | 0.52           | 0.12            |
| Health                               | 0.9         | 0.5            | 0.07            |
| Pension                              | Reference   |                |                 |
| Unemployment                         | 0.68        | 0.5            | 0.16            |
| Dependent variable                   |             |                |                 |
| Spending                             | -1.75       | 0.4            | 0.00            |
| Entitlements                         | Reference   |                |                 |
| Independent variable                 |             |                |                 |
| Cabinet share                        | Reference   |                |                 |
| Left-right                           | -0.52       | 0.54           | 0.34            |
| Data                                 |             |                |                 |
| Time-series                          | Reference   |                |                 |
| Cross-section                        | -0.65       | 0.53           | 0.23            |
| Average year of analysis             | -0.15       | 0.065          | 0.02            |
| Average years of analysis * Spending | 0.14        | 0.09           | 0.13            |
| Specific partisanship study          | 0.47        | 0.3            | 0.13            |
| Constant                             | -0.2        | 0.4            | 0.61            |

*Note:*  $N=106$ . The dependent variable is a dummy that indicates whether a study corroborated partisan theory or not. The average year of analysis is centred around its mean to facilitate a meaningful interpretation of *p*-values in the presence of interaction effects.

Table A4: Partisan Effects Based on Competing Datasets

|                          |        | Unemployment       |                    | Sick Pay           |                    | Pensions           |                    |
|--------------------------|--------|--------------------|--------------------|--------------------|--------------------|--------------------|--------------------|
|                          |        | CWED               | SCIP               | CWED               | SCIP               | CWED               | SCIP               |
| Wenzelburger et al. 2013 | SD     |                    |                    | (+) <sup>***</sup> | (+)                |                    |                    |
|                          | CD     |                    |                    | (~)                | (-) <sup>***</sup> |                    |                    |
|                          | Center | (+) <sup>***</sup> | (+) <sup>**</sup>  | (+) <sup>***</sup> | (+)                |                    |                    |
|                          | Lib    | (+) <sup>***</sup> | (+) <sup>*</sup>   |                    |                    | (+) <sup>***</sup> | (+)                |
|                          | Right  | (+) <sup>*</sup>   | (+) <sup>***</sup> |                    |                    | (+) <sup>***</sup> | (+)                |
| Danforth/Stephens 2013   | Left   | (+) <sup>***</sup> | (+)                | (+) <sup>***</sup> | (+)                | (-) <sup>***</sup> | (+) <sup>***</sup> |
|                          | CD     | (~)                | (~)                | (+) <sup>***</sup> | (+) <sup>***</sup> | (+) <sup>***</sup> | (+) <sup>***</sup> |

*Sources:* Wenzelburger et al. 2013, Tab. 3; Danforth and Stephens 2013, Fig. 1.

*Notes:* SD = Social Democrats, CD = Christian Democrats, Center = Non-Christian center, Lib = Liberals.

(+) = Positive effect on replacement rates, (~) = no effect, (-) = negative effect.

\* Significant at the 0.10 level, \*\* significant at the 0.05 level, \*\*\* significant at the 0.01 level.

Wenzelburger et al. (cross-section, 1990-2000) present best-fit models for the CWED (black) as well as the SCIP (grey). Danforth and Stephens (time-series cross-section, 1975-2000) only give information on statistical significance at the 0.01 level.

Table A5: List of Excluded Studies

| <b>Study</b>               | <b>Reason for Exclusion</b>                                          |
|----------------------------|----------------------------------------------------------------------|
| Huber and Stephens 2000    | Time period: 1962-1987                                               |
| Huber and Stephens 2001    | No journal article                                                   |
| Garrett and Mitchell 2001  | Time period: 1961-1993                                               |
| Moene and Wallerstein 2001 | DV: 'Spending on insurance against income loss' (incl. private exp.) |
| Siegel 2001                | No journal article, language                                         |
| Swank 2001                 | No journal article                                                   |
| Lipsmeyer 2002             | Region: Eastern Europe                                               |
| Swank 2002                 | No journal article                                                   |
| Brady 2003                 | Time period: 1967-1997                                               |
| Bradley et al. 2003        | DV: Redistribution                                                   |
| Obinger and Kittel 2003    | No journal article, language                                         |
| Castles 2004               | No journal article                                                   |
| Tavares 2004               | Time period: 1960-1995                                               |
| Brady et al. 2005          | Legacy effects (since 1946)                                          |
| Bräuninger 2005            | Time period: 1971-1999                                               |
| Hays et al. 2005           | Time period: 1960-2000                                               |
| Kittel and Winner 2005     | see Garrett/Mitchell 2001                                            |
| Pennings 2005              | QCA                                                                  |
| Taylor-Gooby 2005          | Legacy effects                                                       |
| Cusack et al. 2006         | Time period: 1960-1995                                               |
| Dreher 2006                | Time period: 1970-2000                                               |
| Brooks and Manza 2007      | No journal article                                                   |
| Castles 2007               | No journal article                                                   |
| Castles and Obinger 2007   | Time period: 1950-2000 (legacy effects)                              |
| Emmenegger 2007            | Language                                                             |
| Ha 2008                    | Time period: 1960-2000                                               |
| Huber et al. 2008          | Region: Latin America                                                |
| Huo et al. 2008            | Time period: 1971-2000                                               |
| Rueda 2008                 | Time period: 1960-1995                                               |
| Careja and Emmenegger 2009 | Region: Central and Eastern Europe                                   |
| Castles 2009               | Time period: 1960-2003 (legacy effects)                              |
| Kim and Zurlo 2009         | Legacy effects                                                       |
| Vis 2009a                  | QCA                                                                  |
| Vis 2009b                  | QCA                                                                  |
| Congleton and Bose 2010    | Time period: 1960-1998                                               |
| Kühner 2010                | DV: 'extent of change' → direction unclear                           |
| Vis 2010                   | No journal article (QCA)                                             |
| Lipsmeyer and Zhu 2011     | Time period: 1971-2007                                               |
| Noy 2011                   | Region: Latin America                                                |
| Breunig and Busemeyer 2012 | DV: 'Budgetary categories'                                           |
| Fernandez 2012             | No journal article                                                   |
| Pennings 2012              | No journal article (QCA)                                             |
| Rothstein et al. 2012      | Legacy effects (since 1946)                                          |
| Schmidt 2012               | No journal article                                                   |

|                              |                                                  |
|------------------------------|--------------------------------------------------|
| Tepe and Vanhuyse 2012       | No journal article                               |
| Zohlnhöfer et al. 2012       | Language                                         |
| Montanari and Nelson 2013    | No journal article                               |
| Schmitt and Obinger 2013     | Time period: 1960-2000                           |
| Swank 2013                   | No journal article                               |
| Brady and Lee 2014           | DV: 'Government spending'                        |
| Herwartz and Theilen 2014    | Time period: 1971-2008                           |
| Huber and Stephens 2014      | DV: 'Redistribution'                             |
| Jensen 2014                  | No journal article                               |
| Barth et al. 2015            | Time period: 1971-2002                           |
| Gingrich and Häusermann 2015 | Time period: 1970-2011 (+ only interaction term) |
| Ha 2015                      | Region: 'Less developed world'                   |
| Soroka et al. 2016           | Time period: 1970-2007                           |

Note: DV = dependent variable.

## References

- Barth, Erling; Finseraas, Henning; Moene, Karl O. (2015): Political Reinforcement. How Rising Inequality Curbs Manifested Welfare Generosity. In: *American Journal of Political Science* 59 (3), 565–577.
- Bradley, David; Huber, Evelyne; Moller, Stephanie; Nielsen, Francois; Stephens, John D. (2003): Distribution and Redistribution in Postindustrial Democracies. In: *World Politics* 55 (2), 193–228.
- Brady, David (2003): The Politics of Poverty. Left Political Institutions, the Welfare State, and Poverty. In: *Social Forces* 82 (2), 557–588.
- Brady, David; Lee, Hang Y. (2014): The Rise and Fall of Government Spending in Affluent Democracies, 1971-2008. In: *Journal of European Social Policy* 24 (1), 56–79.
- Brady, David; Beckfield, Jason; Seeleib-Kaiser, Martin (2005): Economic Globalization and the Welfare State in Affluent Democracies, 1975–2001. In: *American Sociological Review* 70 (6), 921–948.
- Bräuninger, Thomas (2005): A Partisan Model of Government Expenditure. In: *Public Choice* 125 (3), 409–429.
- Breunig, Christian; Busemeyer, Marius R. (2012): Fiscal Austerity and the Trade-off between Public Investment and Social Spending. In: *Journal of European Public Policy* 19 (6), 921–938.
- Brooks, Clem; Manza, Jeff (2007): *Why Welfare States Persist. The Importance of Public Opinion in Democracies*. Chicago: The University of Chicago Press.
- Careja, Romana; Emmenegger, Patrick (2009): The Politics of Public Spending in Post-Communist Countries. In: *East European Politics and Societies* 23 (2), 165–184.
- Castles, Francis G. (2004): *The Future of the Welfare State. Crisis Myths and Crisis Realities*. Oxford: Oxford University Press.
- Castles, Francis G. (2007): Testing the Retrenchment Hypothesis. An Aggregate Overview. In: Francis G. Castles (ed.): *The Disappearing State? Retrenchment Realities in an Age of Globalisation*. Cheltenham: Edward Elgar, 19–43.
- Castles, Francis G. (2009): What Welfare States Do. A Disaggregated Expenditure Approach. In: *Journal of Social Policy* 38 (1), 45–62.
- Castles, Francis G.; Obinger, Herbert (2007): Social Expenditure and the Politics of Redistribution. In: *Journal of European Social Policy* 17 (3), 206–222.
- Congleton, Roger D.; Bose, Feler (2010): The Rise of the Modern Welfare State, Ideology, Institutions and Income Security. Analysis and Evidence. In: *Public Choice* 144 (3-4), 535–555.
- Cusack, Thomas R.; Iversen, Torben; Rehm, Philipp (2006): Risk at Work: The Demand and Supply Sides of Government Redistribution. In: *Oxford Review of Economic Policy* 22 (3), 365–389.
- Dreher, Axel (2006): The Influence of Globalization on Taxes and Social Policy. An Empirical Analysis for OECD Countries. In: *European Journal of Political Economy* 22 (1), 179–201.



- Emmenegger, Patrick (2007): Parteien und Opportunitätsstrukturen. Die parteipolitischen Determinanten der Staats- und Sozialausgaben. In: *Zeitschrift für Sozialreform* 53 (1), 79–102.
- Fernandez, Juan J. (2012): Population Ageing, the Elderly, and the Generosity of Standard and Minimum Pensions. In: Pieter Vanhuysse und Achim Goerres (eds.): *Ageing Populations in Post-Industrial Democracies. Comparative Studies of Policies and Politics*. London: Routledge, 145–177.
- Garrett, Geoffrey; Mitchell, Deborah (2001): Globalization, Government Spending and Taxation in the OECD. In: *European Journal of Political Research* 39 (2), 145–177.
- Gingrich, Jane R.; Häusermann, Silja (2015): The Decline of the Working Class Vote, the Reconfiguration of the Welfare Support Coalition and Consequences for the Welfare State. In: *Journal of European Social Policy* 25 (1), 50–75.
- Ha, Eunyoung (2008): Globalization, Veto Players, and Welfare Spending. In: *Comparative Political Studies* 41 (6), 783–813.
- Ha, Eunyoung (2015): The Impact of Democracy, Government Ideology, and Globalization on Social Spending in Less Developed Countries. In: *International Journal of Comparative Sociology* 56 (5), 338–365.
- Hays, Jude C.; Ehrlich, Sean D.; Peinhardt, Clint (2005): Government Spending and Public Support for Trade in the OECD. An Empirical Test of the Embedded Liberalism Thesis. In: *International Organization* 59 (2), 473–494.
- Herwartz, Helmut; Theilen, Bernd (2014): Health Care and Ideology. A Reconsideration of Political Determinants of Public Healthcare Funding in the OECD. In: *Health Economics* 23 (2), 225–240.
- Huber, Evelyne; Stephens, John D. (2000): Partisan Governance, Women's Employment, and the Social Democratic Service State. In: *American Sociological Review* 65 (3), 323–342.
- Huber, Evelyne; Stephens, John D. (2001): *Development and Crisis of the Welfare State. Parties and Policies in Global Markets*. Chicago: University of Chicago Press.
- Huber, Evelyne; Stephens, John D. (2014): Income Inequality and Redistribution in Post-Industrial Democracies. Demographic, Economic and Political Determinants. In: *Socio-Economic Review* 12 (2), 245–267.
- Huber, Evelyne; Mustillo, Thomas; Stephens, John D. (2008): Politics and Social Spending in Latin America. In: *The Journal of Politics* 70 (2), 420–436.
- Huo, Jingjing; Nelson, Moira; Stephens, John D. (2008): De-commodification and Activation in Social Democratic Policy. Resolving the Paradox. In: *Journal of European Social Policy* 18 (1), 5–20.
- Jensen, Carsten (2014): *The Right and the Welfare State*. Oxford: Oxford University Press.
- Kim, Tae K.; Zurlo, Karen (2009): How Does Economic Globalisation Affect the Welfare State? Focusing on the Mediating Effect of Welfare Regimes. In: *International Journal of Social Welfare* 18 (2), 130–141.
- Kittel, Bernhard; Winner, Hannes (2005): How Reliable Is Pooled Analysis in Political Economy? The Globalization-Welfare State Nexus Revisited. In: *European Journal of Political Research* 44 (2), 269–293.
- Kühner, Stefan (2010): Do Party Governments Matter After All? Executive Ideology, Constitutional Structures and their Combined Effect on Welfare State Change. In: *Journal of Comparative Policy Analysis* 12 (4), 395–415.
- Lipsmeyer, Christine S. (2002): Parties and Policy. Evaluating Economic and Partisan Influences on Welfare Policy Spending during the European Post-Communist Transition. In: *British Journal of Political Science* 32 (4), 641–661.
- Lipsmeyer, Christine S.; Zhu, Ling (2011): Immigration, Globalization, and Unemployment Benefits in Developed EU States. In: *American Journal of Political Science* 55 (3), 647–664.
- Moene, Karl O.; Wallerstein, Michael (2001): Inequality, Social Insurance, and Redistribution. In: *American Political Science Review* 95 (4), 859–874.
- Montanari, Ingalill; Nelson, Kenneth (2013): Health Care Provision. An Explanatory Analysis of Increase, Decline, Converging Trends and Driving Forces in Comparative Perspective. In: Emmanuele Pavolini und Ana M. Guillén (eds.): *Health Care systems in Europe under Austerity. Institutional Reforms and Performance*. Basingstoke: Palgrave Macmillan, 256–270.
- Noy, Shiri (2011): New Contexts, Different Patterns? A Comparative Analysis of Social Spending and Government Health Expenditure in Latin America and the OECD. In: *International Journal of Comparative Sociology* 52 (3), 215–244.
- Obinger, Herbert; Kittel, Bernhard (2003): Parteien, Institutionen und Wohlfahrtsstaat. Politisch-institutionelle Determinanten der Sozialpolitik in OECD-Ländern. In: Herbert Obinger, Uwe Wagschal und Bernhard

- Kittel (eds.): *Politische Ökonomie. Demokratie und wirtschaftliche Leistungsfähigkeit*. Opladen: Leske + Budrich, 355–383.
- Pennings, Paul (2005): The Diversity and Causality of Welfare State Reforms Explored with Fuzzy-Sets. In: *Quality & Quantity* 39 (3), 317–339.
- Pennings, Paul (2012): Party Government and Welfare State Reforms. A Configurational Approach. In: Hans Keman und Ferdinand Müller-Rommel (eds.): *Party Government in the New Europe*. London: Routledge, 163–182.
- Rothstein, Bo; Samanni, Marcus; Teorell, Jan (2012): Explaining the Welfare State. Power Resources vs. the Quality of Government. In: *European Political Science Review* 4 (1), 1–28.
- Rueda, David (2008): Left Government, Policy, and Corporatism. Explaining the Influence of Partisanship on Inequality. In: *World Politics* 60 (3), 349–389.
- Schmidt, Manfred G. (2012): Political Parties and the Welfare State in Western and Post-Communist Democracies. In: Hans Keman und Ferdinand Müller-Rommel (eds.): *Party Government in the New Europe*. London: Routledge, 139–162.
- Schmitt, Carina; Obinger, Herbert (2013): Spatial Interdependencies and Welfare State Generosity in Western Democracies, 1960-2000. In: *Journal of European Social Policy* 23 (2), 119–133.
- Siegel, Nico A. (2001): Jenseits der Expansion? Sozialpolitik in westlichen Demokratien 1975-1995. In: Manfred G. Schmidt (eds.): *Wohlfahrtsstaatliche Politik. Institutionen, politischer Prozess und Leistungsprofil*. Opladen: Leske + Budrich, 54–89.
- Soroka, Stuart N.; Johnston, Richard; Kevins, Anthony; Banting, Keith; Kymlicka, Will (2016): Migration and Welfare State Spending. In: *European Political Science Review* 8 (2), 173–194.
